# Supplementary material for: Adolescents’ Use of Nicotine-Free and Nicotine E-Cigarettes: A Longitudinal Study of Vaping Transitions and Vaper Characteristics
Source: PubMed Central journal article supplement (PMC8842395; doi:10.1093/ntr/ntab192), 2021-09-21
Supplement: ntab192_suppl_supplementary_appendix.pdf [file ntab192_suppl_supplementary_appendix.pdf]

Appendix 1: Cross tabulation of respondents with different e-cigarette use statuses at T1 vs T2 and T2 vs T3

|                                      | <b>T1</b>   |              | <b>T2<br/>Non-users</b> |          | <b>T2<br/>With nicotine</b> |          | <b>T2<br/>Without nicotine</b> |          | <b>T2<br/>Unsure of nicotine<br/>content</b> |          |
|--------------------------------------|-------------|--------------|-------------------------|----------|-----------------------------|----------|--------------------------------|----------|----------------------------------------------|----------|
|                                      | <b>n</b>    | <b>%</b>     | <b>n</b>                | <b>%</b> | <b>n</b>                    | <b>%</b> | <b>n</b>                       | <b>%</b> | <b>n</b>                                     | <b>%</b> |
| <b>Non-users T1</b>                  | <b>1785</b> | <b>100.0</b> | 1644                    | 93.4     | 46                          | 1.9      | 83                             | 4.1      | 12                                           | 0.6      |
| <b>With nicotine T1</b>              | <b>52</b>   | <b>100.0</b> | 20                      | 43.1     | 27                          | 47.7     | 4                              | 7.7      | 1                                            | 1.5      |
| <b>Without nicotine T1</b>           | <b>154</b>  | <b>100.0</b> | 83                      | 56.0     | 22                          | 13.5     | 46                             | 29.0     | 3                                            | 1.5      |
| <b>Unsure of nicotine content T1</b> | <b>27</b>   | <b>100.0</b> | 18                      | 70.0     | 1                           | 10.0     | 5                              | 12.0     | 3                                            | 8.0      |
| <b>Sum</b>                           | <b>2018</b> | <b>100.0</b> | 1765                    | 87.5     | 96                          | 4.8      | 138                            | 6.8      | 19                                           | 0.9      |
|                                      | <b>T2</b>   |              | <b>T3<br/>Non-users</b> |          | <b>T3<br/>With nicotine</b> |          | <b>T3<br/>Without nicotine</b> |          | <b>T3<br/>Unsure of nicotine<br/>content</b> |          |
|                                      | <b>n</b>    | <b>%</b>     | <b>n</b>                | <b>%</b> | <b>n</b>                    | <b>%</b> | <b>n</b>                       | <b>%</b> | <b>n</b>                                     | <b>%</b> |
| <b>Non-users T2</b>                  | <b>1765</b> | <b>100.0</b> | 1603                    | 90.8     | 79                          | 4.5      | 68                             | 3.9      | 15                                           | 0.8      |
| <b>With nicotine T2</b>              | <b>96</b>   | <b>100.0</b> | 44                      | 45.8     | 39                          | 40.6     | 11                             | 11.5     | 2                                            | 2.1      |
| <b>Without nicotine T2</b>           | <b>138</b>  | <b>100.0</b> | 69                      | 50.0     | 23                          | 16.7     | 43                             | 31.2     | 3                                            | 2.2      |
| <b>Unsure of nicotine content T2</b> | <b>19</b>   | <b>100.0</b> | 10                      | 52.6     | 6                           | 31.6     | 1                              | 5.3      | 2                                            | 10.5     |
| <b>Sum</b>                           | <b>2018</b> | <b>100.0</b> | 1726                    | 85.5     | 147                         | 7.3      | 123                            | 6.1      | 22                                           | 1.1      |
